# Supplementary material for: Genome-wide Association Analysis of Powdery Mildew Resistance in U.S. Winter Wheat
Source: PubMed Central journal article supplement (PMC5603590; doi:10.1038/s41598-017-11230-z), 2017-09-18
Supplement: 41598_2017_11230_MOESM1_ESM.pdf [file 41598_2017_11230_MOESM1_ESM.pdf]

## **SUPPLEMENTARY INFORMATION**

### **Manuscript title**

Genome-wide Association Analysis of Powdery Mildew Resistance in U.S.  
Winter Wheat

### **Author list:**

Na Liu<sup>1,3\*</sup>, Guihua Bai<sup>2</sup>, Meng Lin<sup>3</sup>, Xiangyang Xu<sup>4</sup>, Wenming Zheng<sup>1</sup>

<sup>1</sup>College of Life Science, Henan Agricultural University, Zhengzhou, Henan, 450002,  
China.

<sup>2</sup>USDA–ARS Hard Winter Wheat Genetics Research Unit, Manhattan, KS, 66506,  
USA

<sup>3</sup>Department of Agronomy, Kansas State University, Manhattan, KS, 66506, USA

<sup>4</sup>Wheat, Peanut and Other Field Crops Research Unit, USDA-ARS, Stillwater, OK  
74075, USA

\*Corresponding author: Na Liu ( email: [naliu@henau.edu.cn](mailto:naliu@henau.edu.cn) ).

## **Content**

|                                       |   |
|---------------------------------------|---|
| <b>Supplementary Figure S1.</b> ..... | 1 |
| <b>Supplementary Figure S2.</b> ..... | 2 |
| <b>Supplementary Table S2.</b> .....  | 3 |

**Supplementary Figure S1** Heatmap of Gowers similarity coefficient to show three distinct clusters among the 185 U.S. wheat accessions.

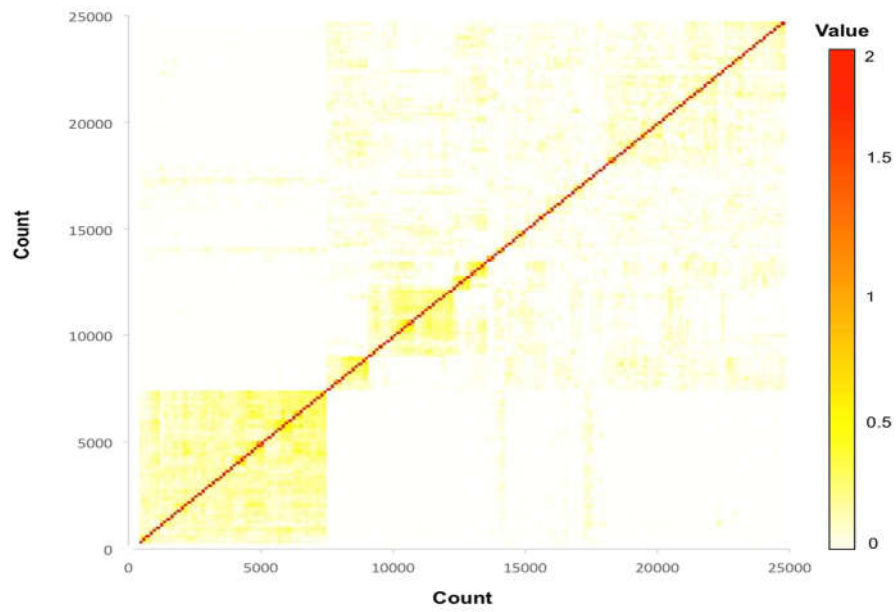

**Supplementary Figure S2** Comparison of QQ plots to select model that fits wheat powdery mildew data from three greenhouse experiments (2010FA, 2011SA, and 2013SS) and one field experiment (2013\_Field).

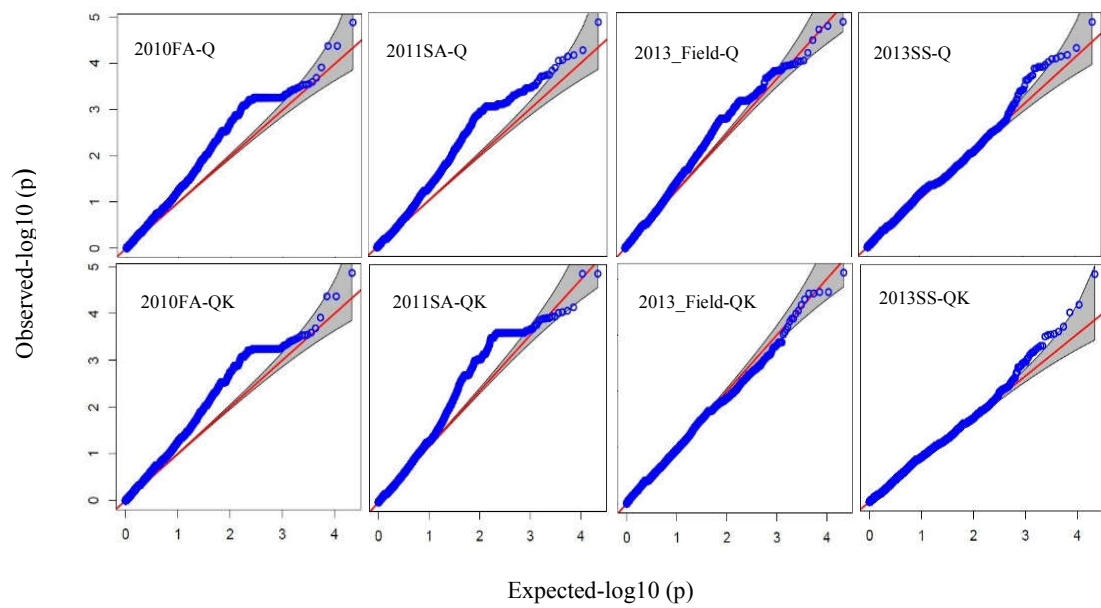

**Supplementary Table S2.** Detailed information for the significant markers linked to QTL for powdery mildew resistance detected from association mapping.

| No. | Marker name             | Chromosome | Marker Type | Position* (cM) | No. | Marker name             | Chromosome | Marker Type | Position* (cM) |
|-----|-------------------------|------------|-------------|----------------|-----|-------------------------|------------|-------------|----------------|
| 1   | Kukri_c46010_146        | 1A         | 90K-SNP     | 35.41          | 21  | RAC875_c16962_288       | 6A         | 90K-SNP     | 25.15          |
| 2   | wsnp_Ex_c31983_40709607 | 1A         | 90K-SNP     | 35.41          | 22  | Excalibur_c23748_1050   | 6A         | 90K-SNP     | --             |
| 3   | Ra_c5696_1556           | 1A         | 90K-SNP     | 44.51          | 23  | BobWhite_c19725_1329    | 3B         | 90K-SNP     | 56.89          |
| 4   | wsnp_Ex_c12101_19360213 | 1A         | 90K-SNP     | 44.51          | 24  | wsnp_JD_c19725_17732526 | 3B         | 90K-SNP     | 56.89          |
| 5   | BobWhite_c34661_208     | 1A         | 90K-SNP     | 44.51          | 25  | Excalibur_c5298_171     | 3B         | 90K-SNP     | 56.89          |
| 6   | wsnp_Ex_c31525_40302747 | 1A         | 90K-SNP     | 44.51          | 26  | Excalibur_c5416_846     | 22         | 90K-SNP     | --             |
| 7   | Kukri_c4099_321         | 1A         | 90K-SNP     | --             | 27  | Ku_c71049_1180          | 22         | 90K-SNP     | --             |
| 8   | Jagger_c2047_362        | 2A         | 90K-SNP     | 59.23          | 28  | wsnp_Ex_c13496_21243167 | 5B         | 90K-SNP     | 38.77          |
| 9   | Ku_c57425_413           | 2A         | 90K-SNP     | 59.23          | 29  | Kukri_c18702_132        | 5B         | 90K-SNP     | 38.77          |
| 10  | CAP8_c4813_252          | 2A         | 90K-SNP     | --             | 30  | wsnp_Ex_c20988_30107609 | 5B         | 90K-SNP     | 38.77          |
| 11  | Kukri_rep_c73477_888    | 2A         | 90K-SNP     | 59.23          | 31  | BobWhite_c14258_434     | 1B         | 90K-SNP     | --             |
| 12  | wsnp_Ex_c2887_5330426   | 2A         | 90K-SNP     | 59.23          | 32  | BS00093945_51           | 1B         | 90K-SNP     | 44.44          |
| 13  | wsnp_Ex_c2887_5330787   | 2A         | 90K-SNP     | 59.23          | 33  | JD_c12243_360           | 1B         | 90K-SNP     | --             |
| 14  | BS00068178_51           | 5A         | 90K-SNP     | 14.78          | 34  | BobWhite_c26130_475     | 1B         | 90K-SNP     | --             |
| 15  | Kukri_c14889_116        | 5A         | 90K-SNP     | 14.78          | 35  | BS00077837_51           | 1D         | 90K-SNP     | 44.44          |
| 16  | GENE-3189_377           | 5A         | 90K-SNP     | 14.78          | 36  | IACX6586                | 1D         | 90K-SNP     | 44.44          |
| 17  | BS00098207_51           | 5A         | 90K-SNP     | 14.78          | 37  | Kukri_c3181_2340        | 1D         | 90K-SNP     | --             |
| 18  | wsnp_Ex_c11621_18716254 | 6A         | 90K-SNP     | 25.15          | 38  | Xscm0009                | 1A         | SSR         | --             |
| 19  | Tdurum_contig9612_80    | 6A         | 90K-SNP     | --             | 39  | Xcfd95                  | 6D         | SSR         | 52.35          |
| 20  | RFL_Contig5693_646      | 6A         | 90K-SNP     | --             | 40  | Xcfd9-2                 | 3D         | SSR         | --             |

\*The chromosome locations were assigned based on W7984 reference sequence map.
